# Supplementary material
Source: Research Square preprint supplement (doi:10.21203/rs.3.rs-8761555/v1)
Supplement: Supplementary file 1 [file 13315f386151d045f8b0d7b3.docx]

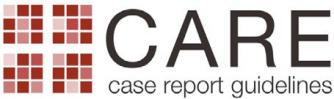

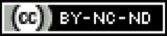

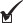
**CARE Checklist of information to include when writing a case report**

| **Topic** | **Item No** | **Checklist item description** | **Reported on Page Number/Line Number** | **Reported on Section/Paragraph** |
| --- | --- | --- | --- | --- |
| Title | 1 | The diagnosis or intervention of primary focus followed by the words “case report” | 1,2 | Title |
| Key Words | 2 | 2 to 5 key words that identify diagnoses or interventions in this case report, including "case report" | 37-38 | Keywords |
| Abstract  (Structured summary) | 3a | Background: state what is known and unknown; why the case report is unique and what it adds to existing literature. | 5-13 | Abstract- Background |
| 3b | Case Description: describe the patient’s demographic details, main symptoms, history, important clinical findings, the main diagnosis, interventions, outcomes and follow-ups. | 15-29, 16-25 | Abstract- Case presentation |
| 3c | Conclusions: summarize the main take-away lesson, clinical impact and potential implications. | 31-36 | Abstract- Conclusion |
| Introduction | 4 | One or two paragraphs summarizing why this case is unique **(may include references)** | 76-84 | Introduction |
| Patient Information | 5a | De-identified patient specific information | 167-169 | Patients information |
| 5b | Primary concerns and symptoms of the patient | 173-227 | Case description |
| 5c | Medical, family, and psycho-social history including relevant genetic information | 95-110 | Eligibility and exclusion criteria |
| 5d | Relevant past interventions with outcomes | 1790180 | CRM mentioned in the cases |
| Clinical Findings | 6 | Describe significant physical examination (PE) and important clinical findings | 236-241 | Diagnostic assessment & outcome measures |
| Timeline | 7 | Historical and current information from this episode of care organized as a timeline | 87-90 | Methodological and diagnostic assessment |
| Diagnostic Assessment | 8a | Diagnostic testing (such as PE, laboratory testing, imaging, surveys). | 236-238 | Mini-BESTest, VVAS, DHI, Tandem Gait |
| 8b | Diagnostic challenges (such as access to testing, financial, or cultural) | Not reported |  |
| 8c | Diagnosis (including other diagnoses considered) | 172,173 | Dix–Hallpike confirmation |
| 8d | Prognosis (such as staging in oncology) where applicable | 332-336 | Discussion – functional improvement |
| Therapeutic Intervention | 9a | Types of therapeutic intervention (such as pharmacologic, surgical, preventive, self-care) | 119 | Intervention protocol |
| 9b | Administration of therapeutic intervention (such as dosage, strength, duration) | 120 | 4 weeks, 5 days/week, 30 min |
| 9c | Changes in therapeutic intervention (with rationale) | Not applicable |  |

| Follow-up and Outcomes | 10a | Clinician and patient-assessed outcomes (if available) | 113-117 | Results & tables |
| --- | --- | --- | --- | --- |
| 10b | Important follow-up diagnostic and other test results | 300-302 | Post-intervention assessment |
| 10c | Intervention adherence and tolerability (How was this assessed?) | 353-357 | Follow-up and outcomes |
| 10d | Adverse and unanticipated events | 356-357 | No adverse events reported |
| Discussion | 11a | A scientific discussion of the strengths AND limitations associated with this case report | 342-351 | Small sample inference |
| 11b | Discussion of the relevant medical literature **with references** | 366-460 | Discussion section |
| 11c | The scientific rationale for any conclusions (including assessment of possible causes) | 337-339 | Auditory–vestibular integration |
| 11d | The primary “take-away” lessons of this case report (without references) in a one paragraph conclusion | 341-351 | Conclusion |
| Patient Perspective | 12 | The patient should share their perspective in one to two paragraphs on the treatment(s) they received | Not reported |  |
| Informed Consent | 13 | Did the patient give informed consent? Please provide if requested | - **Yes** | **No** |
